# Supplementary material for: Genome-wide association study in 79,366 European-ancestry individuals informs the genetic architecture of 25-hydroxyvitamin D levels
Source: Springer Nature journal article supplement (doi:10.1038/s41467-017-02662-2), 2018-01-11
Supplement: MOESM3 [file 41467_2017_2662_MOESM3_ESM.pdf › 41467_2017_2662_MOESM3_ESM.pdf]

### **Description of Supplementary Files**

File Name: Supplementary Data 1

Description: Enrichment of 220 cell-type-specific annotations.
